# Supplementary material for: Co(ii) and Cr(iii) complexes of formate–formamide mixed ligands: synthesis, structures, single crystal-to-single crystal transformation and magnetic behaviour
Source: Royal Society of Chemistry journal article supplement (doi:10.1039/b916878h), 2009-01-01
Supplement: b916878h.pdf [file b916878h.pdf]

## Supporting Information

### Co(II) and Cr(III) complexes of formate-formamide mixed ligands: synthesis, structures, single crystal-to-single crystal transformation and magnetic behavior

Oindrila Sengupta,<sup>a</sup> You Song,<sup>b</sup> and Partha Sarathi Mukherjee<sup>a\*</sup>

<sup>a</sup> Department of Inorganic and Physical Chemistry, Indian Institute of Science, Bangalore-560012, India. Fax: 91-80-23601552; Tel: 91-80-2293-3352; E-mail: psm@ipc.iisc.ernet.in

<sup>b</sup> State Key Laboratory of Coordination Chemistry, Nanjing University, Nanjing-210093, China.

The powder XRD data of the complexes **1a**, **1b** were collected using a D8 Advance X-ray diffractometer to verify the phase purity of these complexes. Experimental powder XRD patterns (Fig. S1) of **1a** and **1b** matched very well with the simulated patterns obtained from the X-ray single crystal structures.

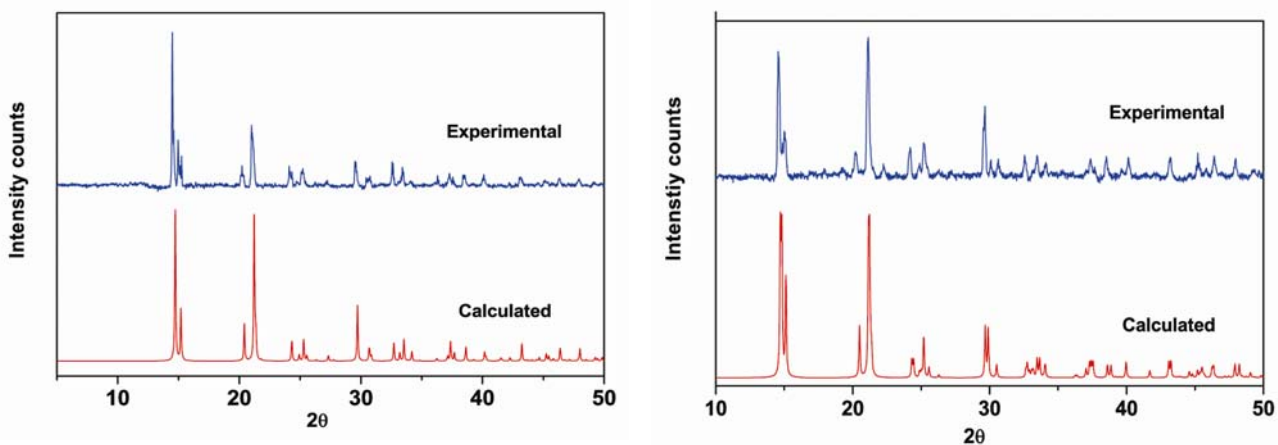

**Fig. S1** Experimental and simulated XRD patterns of complexes **1a** (left) and **1b** (right).

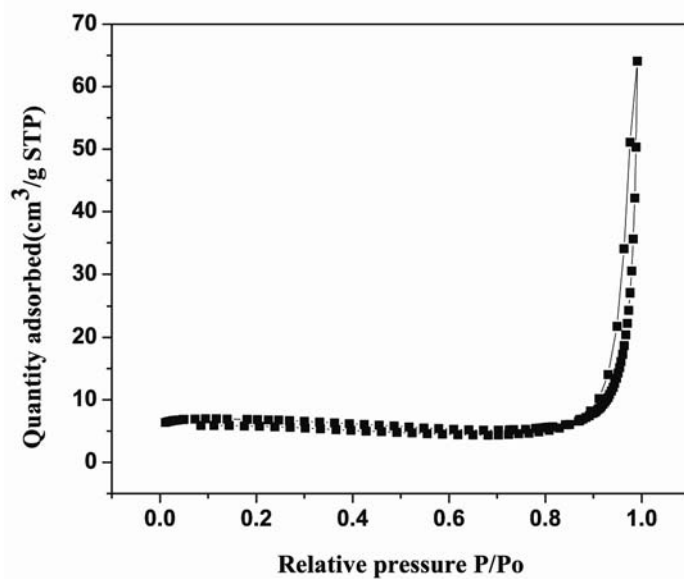

**Fig. S2** N<sub>2</sub> adsorption and desorption plots for **1a**.
